# Supplementary material for: Real-time impedance-activated dielectrophoretic actuation for reconfigurable manipulation of single flowing particles
Source: Royal Society of Chemistry journal article supplement (doi:10.1039/d4lc00622d), 2024-01-01
Supplement: d4lc00622d2.pdf [file d4lc00622d2.pdf]

## Supplementary Material to:

### Real-time impedance-activated dielectrophoretic actuation for reconfigurable manipulation of single flowing particles

Alexis Lefevre,<sup>a,†</sup> Cristian Brandi,<sup>b,†</sup> Adele De Ninno,<sup>c</sup> Filippo Ruggiero,<sup>c</sup> Enrico Verona,<sup>c</sup> Michaël Gauthier,<sup>a</sup> Paolo Bisegna,<sup>b</sup> Aude Bolopion<sup>a</sup> and Federica Caselli<sup>b,\*</sup>

*a. Université de Franche-Comté, CNRS, SUPMICROTECH, Institute FEMTO-ST, F25000 Besançon, France*

*b. Department of Civil Engineering and Computer Science, University of Rome Tor Vergata, Rome, Italy (caselli@ing.uniroma2.it)*

*c. Italian National Research Council – Institute for Photonics and Nanotechnologies (CNR - IFN), Rome, Italy*

*† These authors contributed equally to this work.*

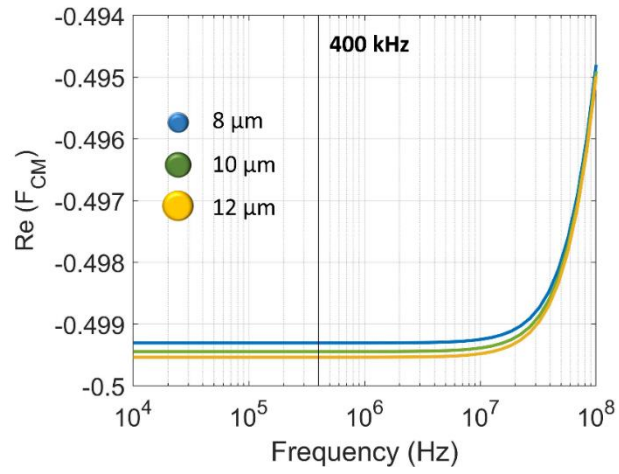

**Figure S1.** Real part of the Clausius-Mossotti factor of the 8, 10, and 12  $\mu\text{m}$  diameter polystyrene beads. Medium properties: conductivity  $\sigma_m = 0.9$  S/m, relative permittivity  $\epsilon_m = 80$ . Bead properties<sup>1,2</sup>: surface conductivity  $\kappa_s = 1.67$  nS (which amounts to a bead conductivity  $\sigma_p = 4\kappa_s/d = 6.7 \times 10^{-4}$  S/m for the beads with diameter  $d = 10$   $\mu\text{m}$ ), bead relative permittivity  $\epsilon_p = 2.5$ .

|                                                  | Zhong et al. <sup>3</sup>                                               | De Wagenaar et al. <sup>4</sup>                                                  | Thomas et al. <sup>5</sup>                                                                                 | Lipp et al. <sup>6</sup>                                   | Present work                                                                              |
|--------------------------------------------------|-------------------------------------------------------------------------|----------------------------------------------------------------------------------|------------------------------------------------------------------------------------------------------------|------------------------------------------------------------|-------------------------------------------------------------------------------------------|
| <b>Sensing approach</b>                          | MIC                                                                     | MIC                                                                              | optical imaging                                                                                            | visual inspection                                          | MIC                                                                                       |
| <b>Actuation approach</b>                        | focused travelling surface acoustic wave                                | DEP                                                                              | DEP                                                                                                        | DEP                                                        | DEP                                                                                       |
| <b>Real-time processing and control approach</b> | C-program running on a processor embedded in the impedance spectroscopy | LabView program using USB connection between computer and impedance spectroscopy | MATLAB program                                                                                             | manual                                                     | C-program running on a processor embedded in the impedance spectroscopy                   |
| <b>Particle pre-focusing mechanism</b>           | sheath flow focusing                                                    | DEP                                                                              | DEP                                                                                                        | none                                                       | none                                                                                      |
| <b>Throughput</b>                                | hundreds of particle/s                                                  | < 5 particle/s                                                                   | up to 0.9 particle/s                                                                                       | ~0.1 particle/s                                            | ~1 particle/s                                                                             |
| <b>Type of manipulation</b>                      | two-way sorting (target particles are deviated)                         | two-way sorting (target particles are deviated)                                  | two-way sorting (target particles are deviated) + demonstration of stream control through up to 5 channels | multi-way trajectory control (demonstrated 5-way)          | multi-way trajectory control (demonstrated 3-way)                                         |
| <b>Reported application</b>                      | enrichment of viable cells (cryopreserved primary PBMC samples)         | sorting of beads from sperm cells                                                | sorting of fluorescent particles/cells                                                                     | formation of aggregates of controlled size and composition | particle position-swapping, size-based separation, sorting of a desired particle sequence |

**Table S1:** Representative systems for selective manipulation of individual flowing particles/cells based on MIC-sensing and/or DEP-actuation.

## References

- 1 C. Yu, J. Vykoukal, D. M. Vykoukal, J. A. Schwartz, L. Shi and P. R. C. Gascoyne, *Journal of Microelectromechanical Systems*, 2005, **14**, 480–487.
- 2 M. D. Vahey and J. Voldman, *Anal Chem*, 2009, **81**, 2446–2455.
- 3 J. Zhong, P. Li, M. Liang and Y. Ai, *Adv Mater Technol*, 2022, **7**, 2100906.
- 4 B. de Wagonaar, S. Dekker, H. L. de Boer, J. G. Bomer, W. Olthuis, A. Van Den Berg and L. I. Segerink, *Lab Chip*, 2016, **16**, 1514–1522.
- 5 R. S. W. Thomas, P. D. Mitchell, R. O. C. Oreffo, H. Morgan and N. G. Green, *Electrophoresis*, 2019, **40**, 2718–2727.
- 6 C. Lipp, L. Koebel, A. Bertsch, M. Gauthier, A. Bolopion and P. Renaud, *Front Bioeng Biotechnol*, 2022, **10**, 910578.
